# Supplementary material for: Breast-milk Lacticaseibacillus gasseri FN136 alleviates DSS-induced ulcerative colitis through microbiota-independent metabolite–host interactions
Source: Research Square preprint supplement (doi:10.21203/rs.3.rs-7525483/v1), 2025-09-22
Supplement: Supplementary file 1 [file c77aac786ca2ddc9ef6f655d.docx]

Supplementary materials

**Breast-milk *Lacticaseibacillus gasseri* FN136 alleviates DSS-induced ulcerative colitis through microbiota-independent metabolite–host interactions**

Qingcui Li1, Wenhao Wang1, Fan Zhou1, Xin Geng1, Ce Qi1,Chengwen Li2, Jin Sun1*

1 Institute of Nutrition and Health, Qingdao University, Qingdao 266071, China

2 Gannan Tibetan Autonomous Prefecture Maternal and Child Health Hospital

*Correspondence: Jin Sun (sunj@qdu.edu.cn)


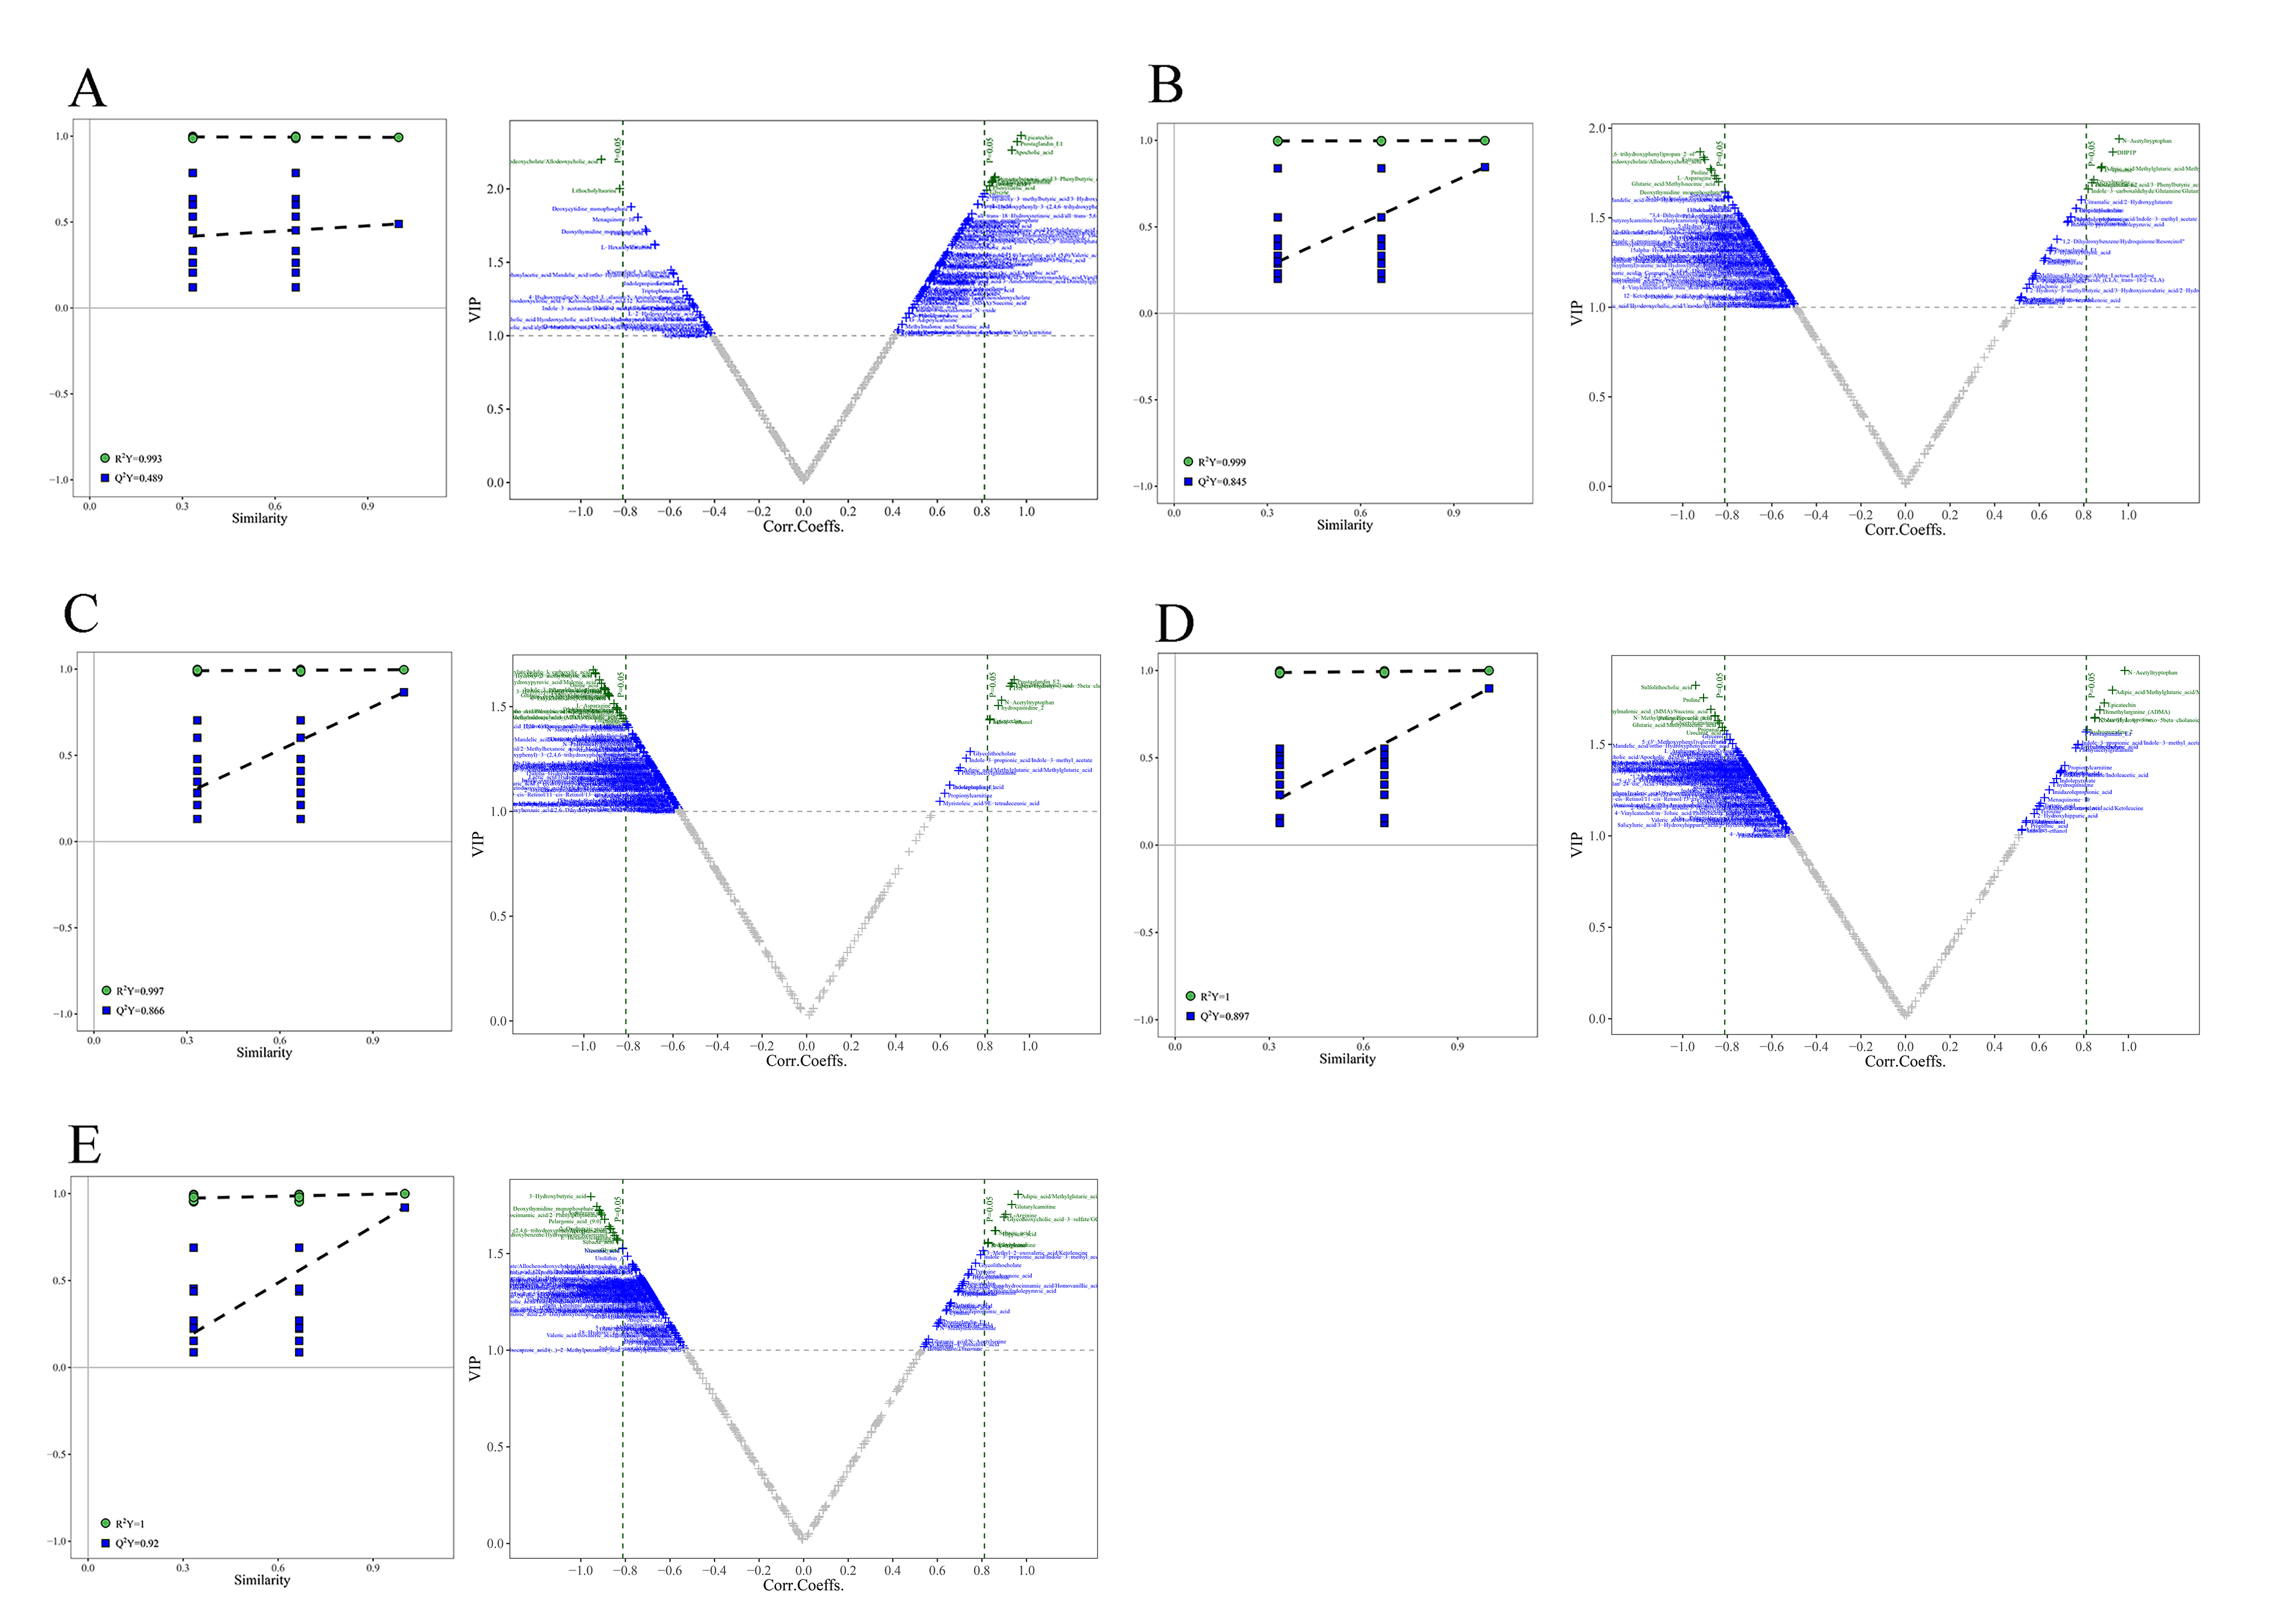


Figure S1. Non-targeted metabolomic profiling of FN136 fermentation broth across multiple time points. (A) OPLS-DA permutation test and corresponding v-plot comparing 0 h and 8 h fermentation samples. (B) OPLS-DA permutation test and corresponding v-plot comparing 0 h and 12 h fermentation samples. (C) OPLS-DA permutation test and corresponding v-plot comparing 0 h and 16 h fermentation samples. (D) OPLS-DA permutation test and corresponding v-plot comparing 0 h and 20 h fermentation samples. (E) OPLS-DA permutation test and corresponding v-plot comparing 0 h and 20 h fermentation samples. 0 h, unfermented medium; 8 h, 8-h FN136 culture supernatant; 12 h, 12-h FN136 culture supernatant; 16 h, 16-h FN136 culture supernatant; 20 h, 20-h FN136 culture supernatant; 24 h, 24-h FN136 culture supernatant.


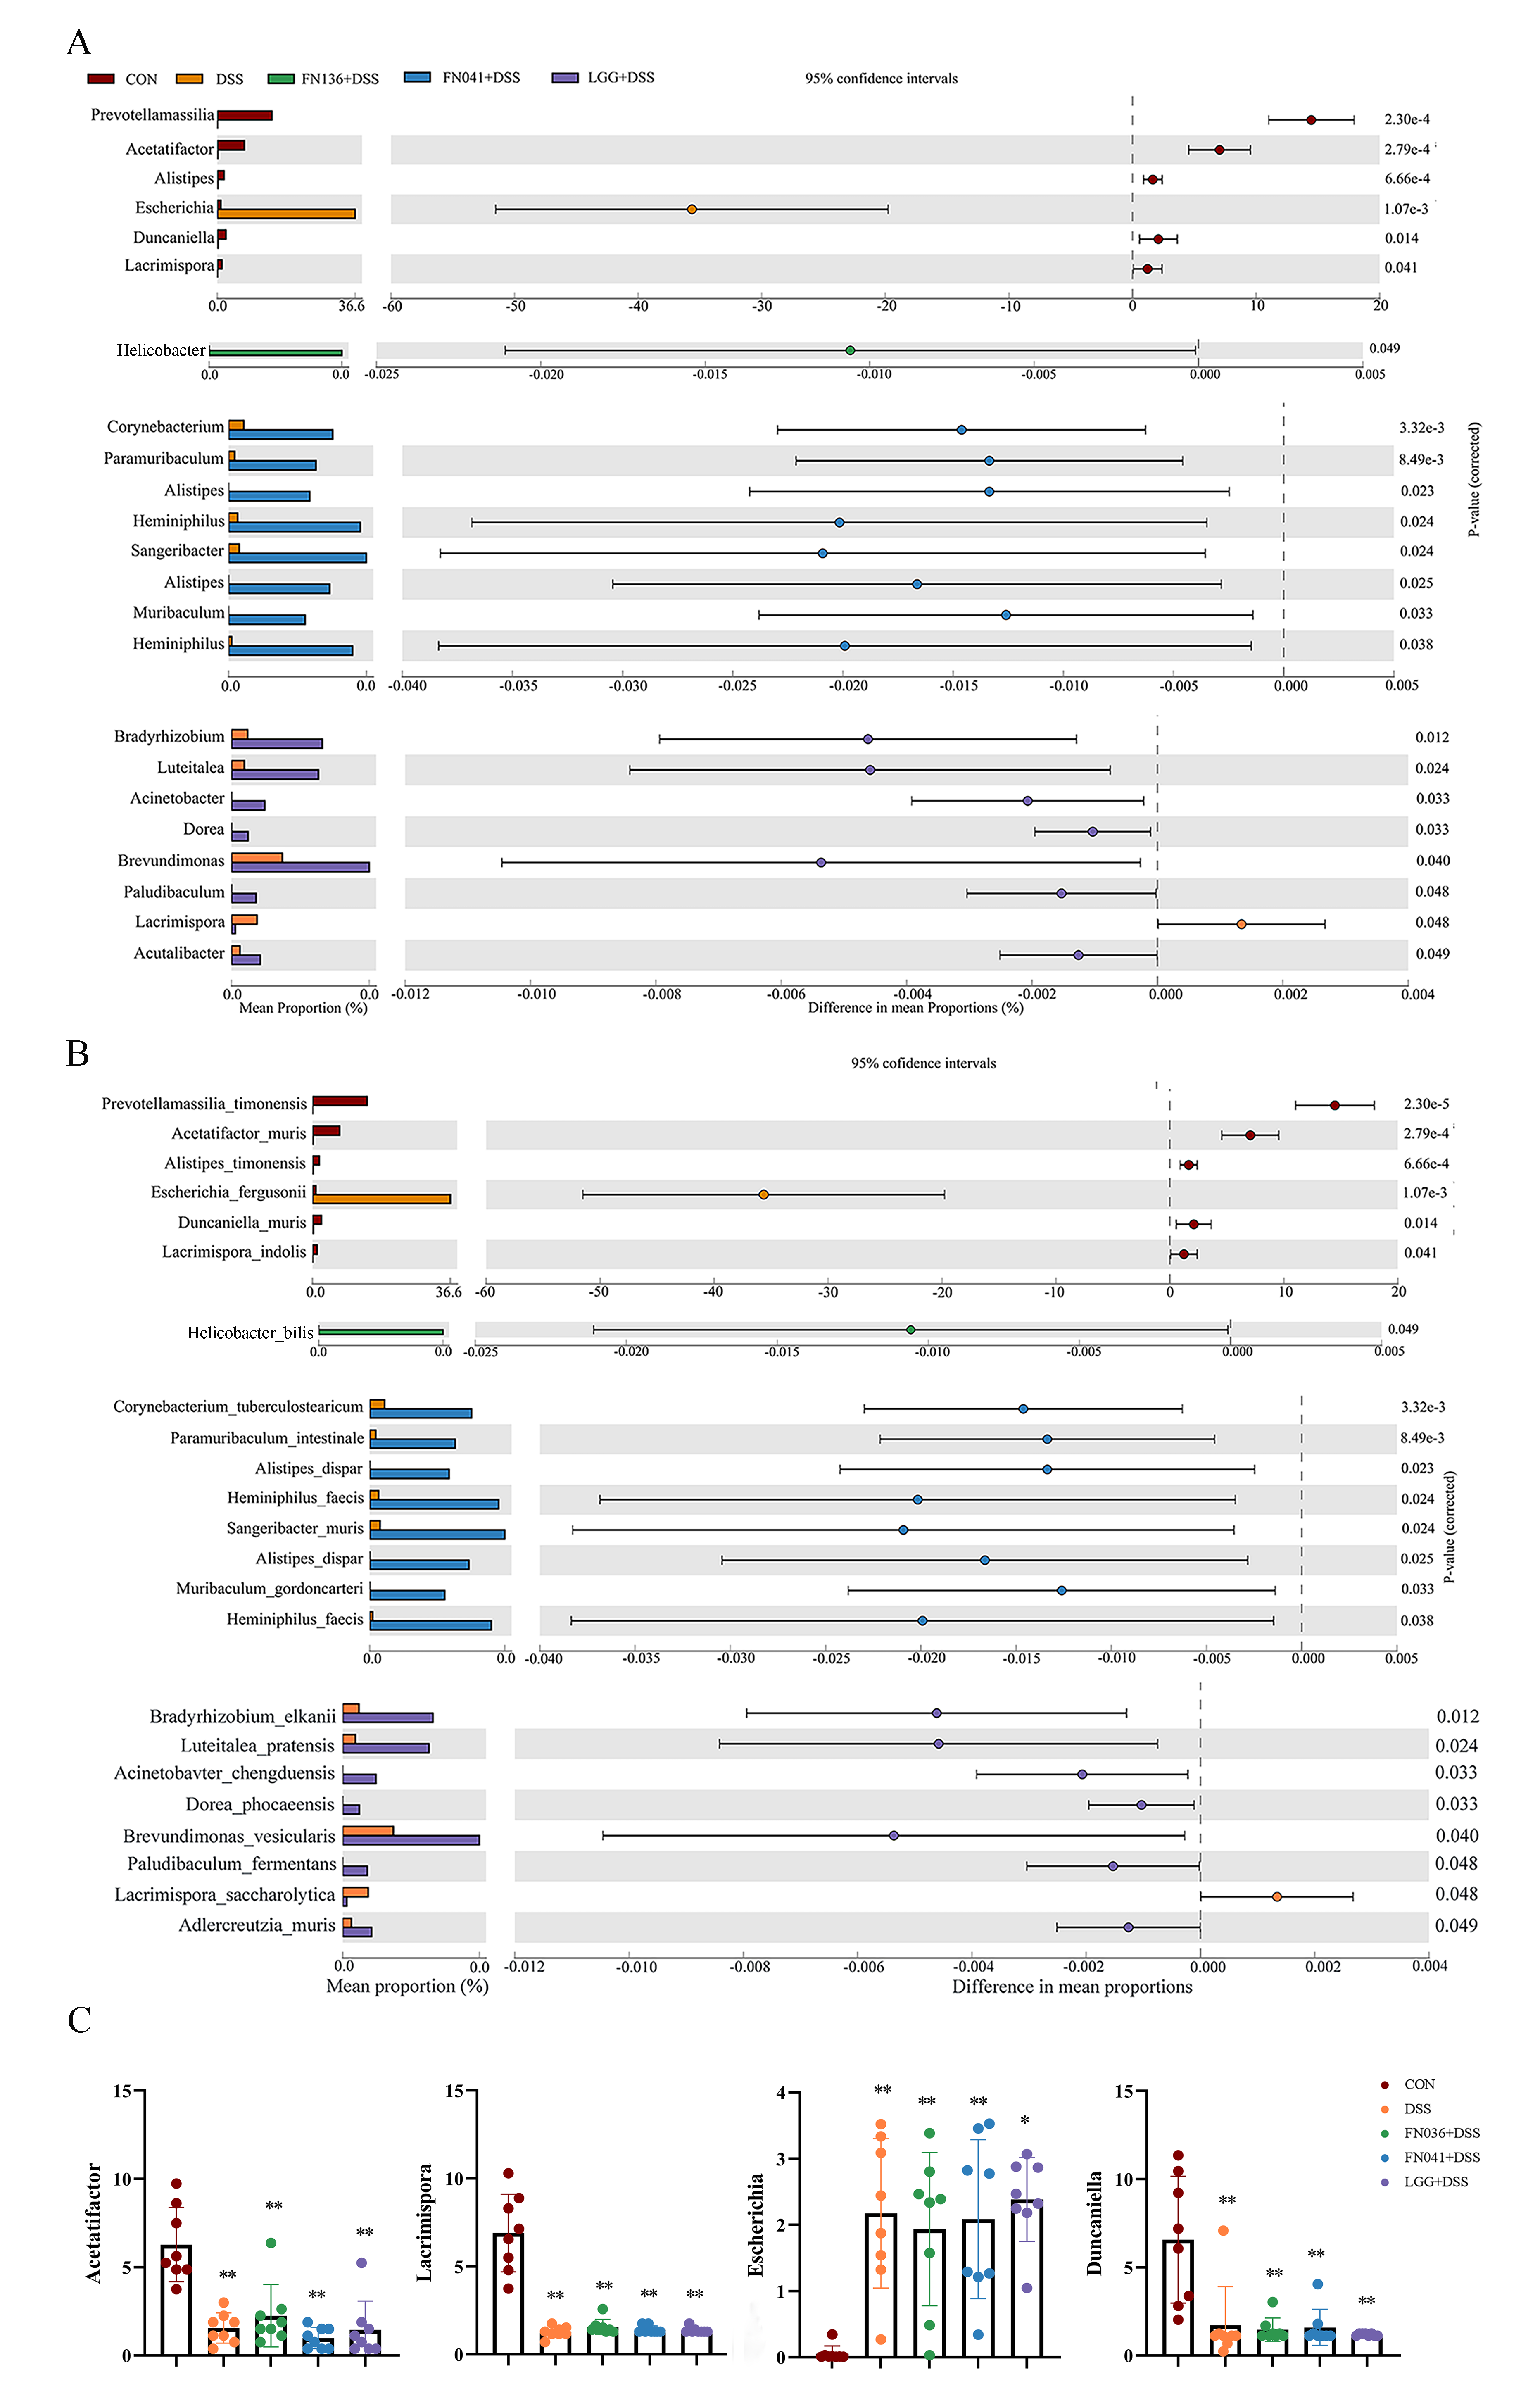


Figure S2.Effects of *Lacticaseibacillus gasseri* FN136 on the relative abundance of the gut microbiota(n=8 per group). (A) Differential analysis of the murine gut microbiota at the genus level by STAMP. (B) Differential analysis of the murine gut microbiota at the species level by STAMP. (C) Relative abundance of discriminatory genera between the CON and DSS groups.CON, healthy control; DSS, dextran sulfate sodium-induced UC; FN136+DSS, *L. gasseri* FN136-treated DSS UC; FN041+DSS, *L. reuteri* FN041-treated DSS UC; LGG+DSS, *L. rhamnosus* GG-treated DSS UC.


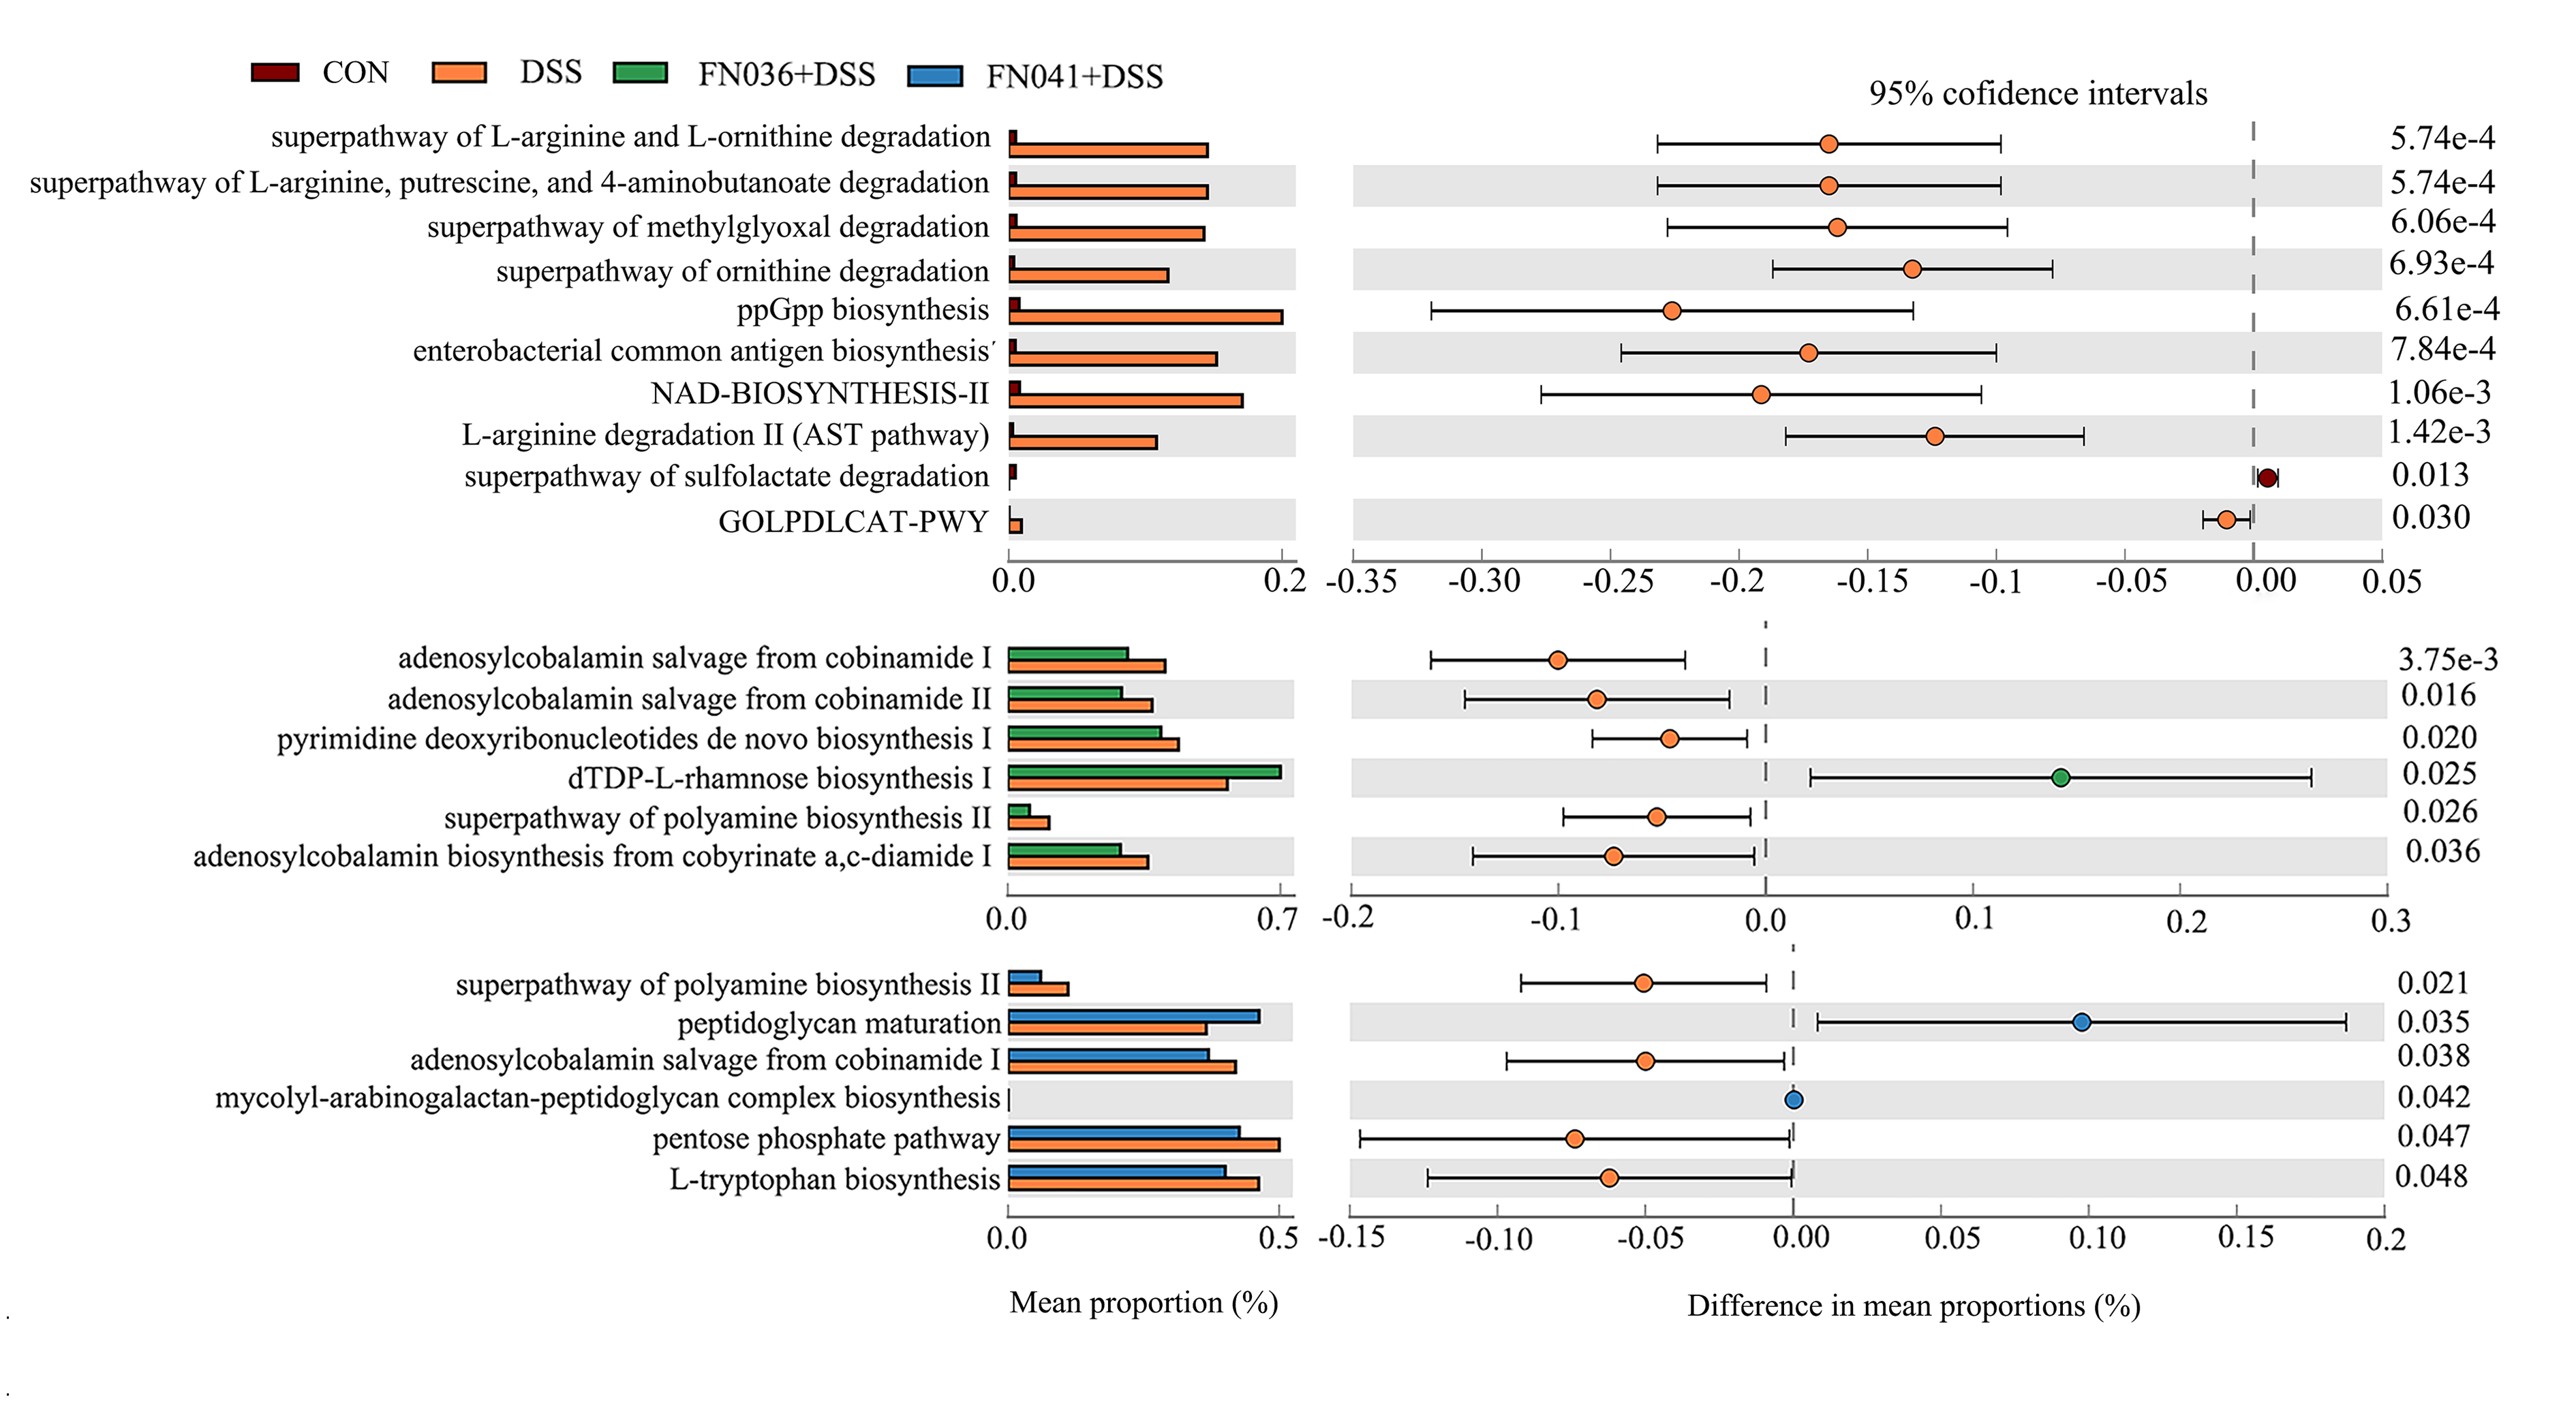


Figure S3. Functional prediction analysis using STAMP(n=8 per group). CON, healthy control; DSS, dextran sulfate sodium-induced UC; FN136+DSS, *L. gasseri* FN136-treated DSS UC; FN041+DSS, *L. reuteri* FN041-treated DSS UC; LGG+DSS, *L. rhamnosus* GG-treated DSS UC.
